# Supplementary material for: Body Dissatisfaction and Disordered Eating Behaviors: The Mediation Role of Smartphone Addiction and Depression
Source: MDPI journal article supplement (doi:10.3390/nu14061281), 2022-03-17
Supplement: s1 [file s1]

**Supplementary material for**  
**Body Dissatisfaction and Disordered Eating Behaviors: The Mediation Role of Smartphone Addiction and Depression**

**Table S1.** Summary of indirect effects from body dissatisfaction to disordered eating behaviors in male sample.

|                                  | <b>Coefficient</b> | <b>S.E</b> | <b>95% CI</b> | <b>P</b> |
|----------------------------------|--------------------|------------|---------------|----------|
| Indirect effects (via mediators) |                    |            |               |          |
| BD→MP→RE                         | 0.041              | 0.005      | 0.031, 0.051  | <0.001   |
| BD→DP→RE                         | 0.033              | 0.004      | 0.025, 0.042  | <0.001   |
| BD→MP→DP→RE                      | 0.011              | 0.002      | 0.010, 0.015  | <0.001   |
| BD→MP→EE                         | 0.069              | 0.008      | 0.054, 0.061  | <0.001   |
| BD→DP→EE                         | 0.025              | 0.004      | 0.017, 0.085  | <0.001   |
| BD→MP→DP→EE                      | 0.008              | 0.001      | 0.006, 0.033  | <0.001   |
| BD→MP→External E                 | 0.040              | 0.005      | 0.030, 0.050  | <0.001   |
| BD→DP→External E                 | 0.054              | 0.006      | 0.043, 0.065  | <0.001   |
| BD→MP→DP→External E              | 0.018              | 0.002      | 0.014, 0.023  | <0.001   |

Note: S.E= standard error; BD=body dissatisfaction; MP= smartphone addiction; DP =depression; RE= restraint eating; EE= emotional eating; External E = external eating.

**Table S2.** Summary of indirect effects from body dissatisfaction to disordered eating behaviors in female sample.

|                                  | <b>Coefficient</b> | <b>S.E</b> | <b>95% CI</b> | <b>P</b> |
|----------------------------------|--------------------|------------|---------------|----------|
| Indirect effects (via mediators) |                    |            |               |          |
| BD→MP→RE                         | 0.063              | 0.007      | 0.050, 0.077  | <0.001   |
| BD→DP→RE                         | 0.031              | 0.005      | 0.022, 0.040  | <0.001   |
| BD→MP→DP→RE                      | 0.014              | 0.002      | 0.010, 0.018  | <0.001   |
| BD→MP→EE                         | 0.069              | 0.007      | 0.055, 0.083  | <0.001   |
| BD→DP→EE                         | 0.063              | 0.007      | 0.050, 0.077  | <0.001   |
| BD→MP→DP→EE                      | 0.028              | 0.003      | 0.023, 0.034  | <0.001   |
| BD→MP→External E                 | 0.107              | 0.009      | 0.090, 0.124  | <0.001   |
| BD→DP→External E                 | 0.024              | 0.004      | 0.016, 0.032  | <0.001   |
| BD→MP→DP→External E              | 0.011              | 0.002      | 0.007, 0.014  | <0.001   |

Note: S.E= standard error; BD=body dissatisfaction; MP= smartphone addiction; DP =depression; RE= restraint eating; EE= emotional eating; External E = external eating.
